# Supplementary material
Source: publisher figshare collection journal article supplement (https://acs.figshare.com/ndownloader/files/4744795)
Supplement: Supplementary file 1 [file 4744795]

# Supporting information to Malve & Qian: Estimating nutrients and Chlorophyll a relationships in Finnish Lakes

September 5, 2006

| <i>Lake Type</i> | <i>mean TP</i> | <i>mean TN</i> | <i>mean Chla</i> | <i>TN/TP -ratio</i><br>(percentiles) |      |
|------------------|----------------|----------------|------------------|--------------------------------------|------|
|                  |                |                |                  | 5 %                                  | 95 % |
| 1                | 11.0           | 347            | 4.9              | 17.1                                 | 79.0 |
| 2                | 18.3           | 485            | 9.3              | 14.5                                 | 60.0 |
| 3                | 13.3           | 349            | 5.9              | 16.0                                 | 77.0 |
| 4                | 20.3           | 496            | 11.0             | 14.1                                 | 66.7 |
| 5                | 32.2           | 582            | 18.6             | 9.3                                  | 50.0 |
| 6                | 34.1           | 631            | 21.2             | 11.7                                 | 33.3 |
| 7                | 20.6           | 444            | 12.1             | 12.1                                 | 75.0 |
| 8                | 39.5           | 715            | 25.9             | 10.8                                 | 42.9 |
| 9                | 52.2           | 815            | 33.9             | 9.6                                  | 31.3 |
| all lakes        | 27.8           | 571            | 16.4             | 11.7                                 | 57.1 |

Table 1: Mean of observed TP [ $\mu\text{g L}^{-1}$ ], TN [ $\mu\text{g L}^{-1}$ ] and Chla [ $\mu\text{g L}^{-1}$ ] and 5% & 95 % percentiles of TN/TP-ratio within Lake types specified by Finnish Environment Institute.

| <i>Type</i> | <i>TP - TN</i> | <i>TP - Chla</i> | <i>TN - Chla</i> |
|-------------|----------------|------------------|------------------|
| 1           | 0.64           | 0.75             | 0.69             |
| 2           | 0.66           | 0.73             | 0.55             |
| 3           | 0.65           | 0.80             | 0.68             |
| 4           | 0.78           | 0.83             | 0.77             |
| 5           | 0.80           | 0.84             | 0.79             |
| 6           | 0.76           | 0.64             | 0.60             |
| 7           | 0.76           | 0.87             | 0.74             |
| 8           | 0.76           | 0.87             | 0.74             |
| 9           | 0.78           | 0.80             | 0.78             |
| all         | 0.80           | 0.83             | 0.76             |

Table 2: Correlation between log(TP), log(TN) and log(Chla) within Lake types specified by Finnish Environment Institute.

| <i>Year</i> | <i>N</i> | <i>Year</i> | <i>N</i> | <i>Year</i> | <i>N</i> | <i>Year</i> | <i>N</i> |
|-------------|----------|-------------|----------|-------------|----------|-------------|----------|
| 1988        | 2        | 1993        | 426      | 1998        | 1,610    | 2003        | 2,220    |
| 1989        | 59       | 1994        | 1,478    | 1999        | 1,533    | 2004        | 774      |
| 1990        | 66       | 1995        | 1,621    | 2000        | 2,029    |             |          |
| 1991        | 78       | 1996        | 1,687    | 2001        | 1,972    |             |          |
| 1992        | 71       | 1997        | 1,714    | 2002        | 2,088    |             |          |

Table 3: The number of observations (N) per year from 1988 to 2004.

| <i>Type</i> | <i>N</i> | <i>Type</i> | <i>N</i> | <i>Type</i> | <i>N</i> |
|-------------|----------|-------------|----------|-------------|----------|
| 1           | 485      | 4           | 3,949    | 7           | 391      |
| 2           | 6,536    | 5           | 1,080    | 8           | 2,729    |
| 3           | 388      | 6           | 1,326    | 9           | 2,544    |

Table 4: Number of observations (N) within the lake types.

Coplots are designed to graphically present a multivariate relationship on a two-dimensional surface, using a series of bivariate scatter plots. Figures 1 and 2 in Supporting Information shows the four-dimensional surface of  $\log(\text{Chla})$  as a function of  $\log(\text{TP})$ ,  $\log(\text{TN})$ , and lake depth. In Figure 1, Supporting Information, each panel illustrates the  $\log(\text{Chla})$ – $\log(\text{TP})$  relationship at different  $\log(\text{TN})$  and depth values (indicated by the location of the shaded bars on top of panels and on the right hand side of the panels). The far left panels have the lowest  $\log(\text{TN})$  values and the far right panels have the highest  $\log(\text{TN})$  values. Lowest panels have the shallowest and the highest panels the deepest lakes. Figure 2, Supporting Information, shows the  $\log(\text{Chla})$ – $\log(\text{TP})$  relationship is relatively stable, regardless of  $\log(\text{TN})$  and depth; while the  $\log(\text{Chla})$ – $\log(\text{TN})$  relationship is dependent on  $\log(\text{TP})$  and depth values. Although the  $\log(\text{Chla})$ – $\log(\text{TN})$  relationship is noisier, the Loess curve between the variables (follows the trend of the data) tends to increase with  $\log(\text{TP})$  and decrease with depth.

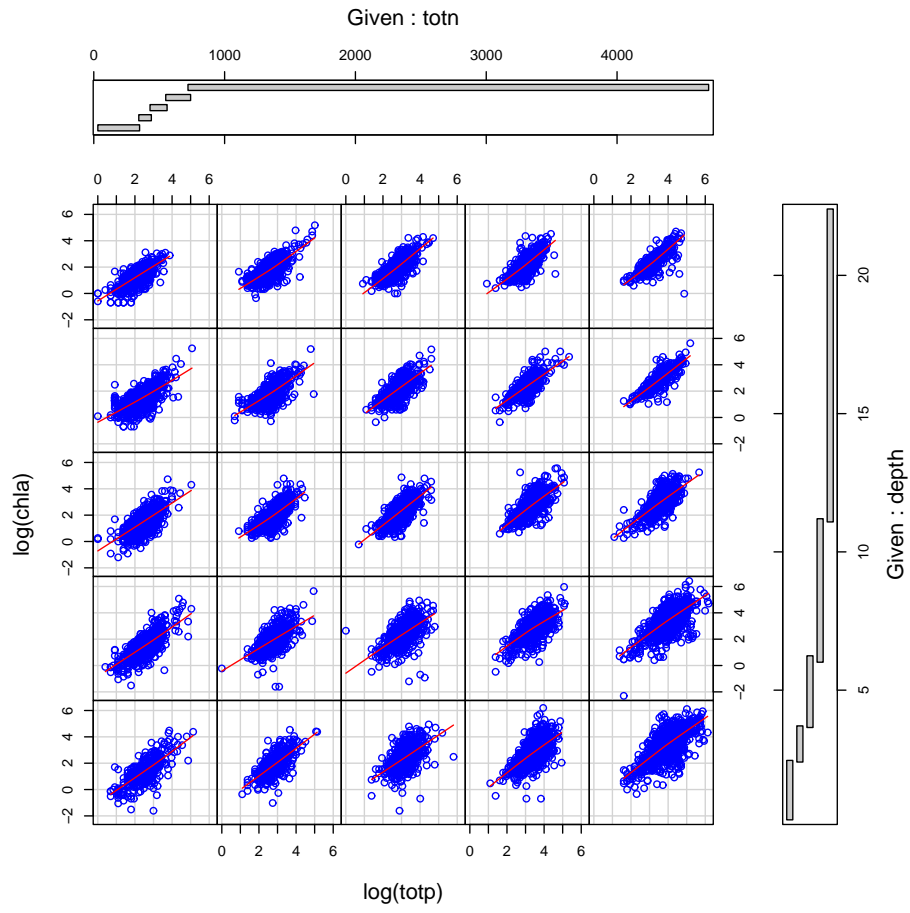

Figure 1: Conditioning plot that illustrates the  $\log(\text{Chla})$  [ $\mu\text{g L}^{-1}$ ] to  $\log(\text{TP})$  [ $\mu\text{g L}^{-1}$ ] relationship conditioned on  $\log(\text{TN})$  concentrations [ $\mu\text{g L}^{-1}$ ] and depth [m]. The gray solid line is the Loess curve that follows the trend of the data.

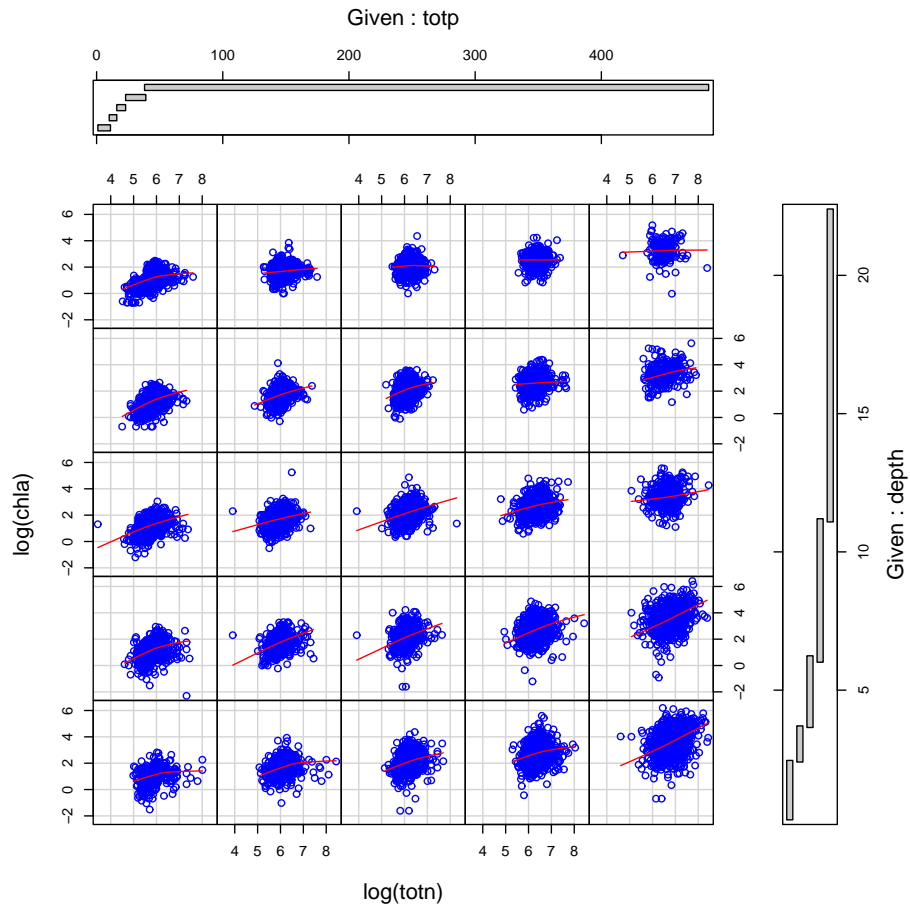

Figure 2: Conditioning plot that illustrates the  $\log(\text{Chla})$  [ $\mu\text{g L}^{-1}$ ] to  $\log(\text{TN})$  [ $\mu\text{g L}^{-1}$ ] relationship conditioned on  $\log(\text{TP})$  concentrations [ $\mu\text{g L}^{-1}$ ] and depth [m]. The gray solid line is the Loess curve.

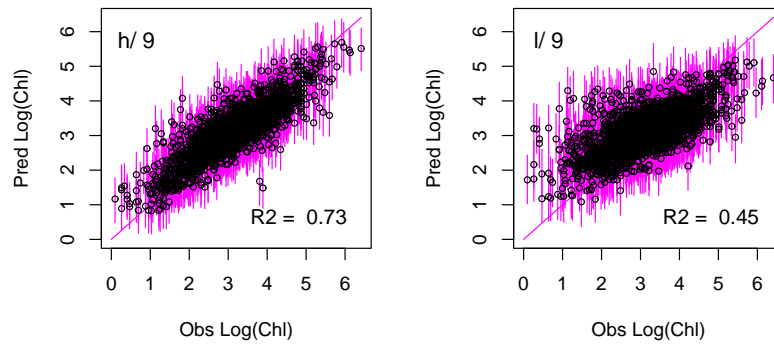

Figure 3: 10 %, 50 % (circle) and 90 % percentiles of predicted Chl<sub>a</sub> concentration [ $\mu\text{g L}^{-1}$ ] as a function of observed value for shallow, very humic lakes, type 9 . Percentiles have been calculated with the hierarchical linear model (h/9) and with non-hierarchical type specific dummy variable model. 10 % and 90 % percentiles are connected with vertical gray lines.  $R^2$  denotes R squared.
